# Supplementary material for: High Virulence and Multidrug Resistance of Escherichia coli Isolated in Periodontal Disease
Source: MDPI journal article supplement (doi:10.3390/microorganisms11010045), 2022-12-23
Supplement: s1 [file s1]

## Supplementary material S1.

### Primers used to amplify the virulence genes of *E. coli*.

The PCR method and the sequences of the primers to identify the virulence genes were described by:

Momtaz, H; Karimian, A; Madan, M; Dehkordi, S.F; Ranjbar, R; Sarshar, M; Souod, N. Uropathogenic *Escherichia coli* in Iran: Serogroup distributions, virulence factors and antimicrobial resistance properties. *Ann. Clin. Microbiol. Antimicrob.* **2013**, 12:8.

Rodriguez-Siek KE, Giddings CW, Doetkott C, Johnson TJ, Fakhr MK, Nolan LK. Comparison of *Escherichia coli* isolates implicated in human urinary tract infection and avian colibacillos. *Microbiol.* **2005**, 151, 2097-2110.

| Gene            | Name      | Sequence 5'-3'            | PCR product size (bp) |
|-----------------|-----------|---------------------------|-----------------------|
| <b>ADHESINS</b> |           |                           |                       |
| <i>papA</i>     | PapA-F    | ATGGCAGTGGTGTCTTTTGGTG    | 717                   |
|                 | PapA-R    | CGTCCCACCATACGTGCTCTTC    |                       |
| <i>papGI</i>    | papGJ96-F | TCGTGCTGAGGTCCGGAATTT     | 461                   |
|                 | papGJ96-R | TGGCATCCCCCAACATTATCG     |                       |
| <i>papGII</i>   | papGIA2-F | GGGATGAGCGGGCCTTTGAT      | 190                   |
|                 | papGIA2-R | CGGGCCCCCAAGTAACTCG       |                       |
| <i>papGIII</i>  | prsJ96-F  | GGCCTGCAATGGATTTACCTGG    | 258                   |
|                 | prsJ96-R  | CCACCAAATGACCATGCCAGAC    |                       |
| <i>fimH</i>     | FimH-F    | TGCAGAACGGATAAGCCGTGG     | 508                   |
|                 | FimH-R    | GCAGTCACCTGCCCTCCGGTA     |                       |
| <i>afa</i>      | Afa-F     | GCTGGGCAGCAAAGTATAACTCTC  | 750                   |
|                 | Afa-R     | CATCAAGCTGTTTGTTCGTCCGCCG |                       |
| <i>sfaS</i>     | SfaS-F    | GTGGATACGACGATTACTGTG     | 244                   |
|                 | SfaS-R    | CCGCCAGCATTCCTGTATTC      |                       |
| <i>iha</i>      | IHA-F     | CTGGCGGAGGCTCTGAGATCA     | 827                   |
|                 | IHA-R     | TCCTTAAGCTCCCGCGGCTGA     |                       |
| <i>focG</i>     | FocG-F    | CAGCACAGGCAGTGGATACGA     | 364                   |
|                 | FocG-R    | GAATGTCGCCTGCCATTGCT      |                       |
| <i>bmaE</i>     | bmaE-F    | ATGGCGCTAACTTGCCATGCTG    | 507                   |

|                     |          |                           |      |
|---------------------|----------|---------------------------|------|
|                     | bmaE-R   | AGGGGGACATATAGCCCCCTTC    |      |
| TOXINS              |          |                           |      |
| cnfI                | cnf-F    | AAGATGGAGTTTCCTATGCAGGAG  | 498  |
|                     | cnf-R    | TGGAGTTTCCTATGCAGGAG      |      |
| hlyA                | hly-F    | AACAAGGATAAGCACTGTTCTGGCT | 1177 |
|                     | hly-R    | ACCATATAAGCGGTCATTCCCGTCA |      |
| tsh                 | Tsh-F    | ACTATTCTCTGCAGGAAGTC      | 824  |
|                     | Tsh-R    | CTCCGATGTTCTGAACGT        |      |
| usp                 | usp-F    | ACATTCACGGCAAGCCTCAG      | 440  |
|                     | usp-R    | AGCGAGTTCCTGGTGAAAGC      |      |
| set-1               | set-1-F  | GTGAACCTGCTGCCGATATC      | 147  |
|                     | set-1-R  | ATTTGTGGATAAAAATGACG      |      |
| astA                | astA-F   | ATGCCATCAACACAGTATAT      | 110  |
|                     | astA-R   | GCGAGTGACGGCTTTGTAGT      |      |
| IRON UPTAKE SYSTEMS |          |                           |      |
| iuc                 | Iuc-F    | ATGAGAATCATTATTGACATAATTG | 1482 |
|                     | Iuc-R    | CTCACGGGTGAAAATATTTT      |      |
| iroN                | IRONEC-F | AAGTCAAAGCAGGGGTGCCCCG    | 665  |
|                     | IRONEC-R | GACGCCGACATTAAGACGCAG     |      |
| irp2                | Irp2-F   | AAGGATTCGCTGTTACCGGAC     | 413  |
|                     | Irp2-R   | AACTCCTGATACAGGTGGC       |      |
| feoB                | FEOB-F   | AATTGGCGTGCATGAAGATAACTG  | 470  |
|                     | FEOB-R   | AGCTGGCGACCTGATAGAACAATG  |      |
| fyuA                | FyuA-F   | TGATTAACCCCGCGACGGGAA     | 787  |
|                     | FyuA-R   | CGCAGTAGGCACGATGTTGTA     |      |
| ireA                | IREA-F   | GATGACTCAGCCACGGGTAA      | 254  |
|                     | IREA-R   | CCAGGACTCACCTCACGAAT      |      |
| PROTECTINS          |          |                           |      |

|                    |         |                         |     |
|--------------------|---------|-------------------------|-----|
| <i>kpsMT</i>       | kpsII-F | GCGCATTGCTGATACTGTTG    | 272 |
|                    | kpsII-R | CATCCAGACGATAAGCATGAGCA |     |
| <i>ompT</i>        | ompT-F  | ATCTAGCCGAAGAAGGAGGC    | 559 |
|                    | ompT-R  | CCCGGGTCATAGTGTTTCATC   |     |
| <i>iss</i>         | Iss-F   | ATCACATAGGATTCTGCCG     | 309 |
|                    | Iss-R   | CAGCGGAGTATAGATGCCA     |     |
| <i>traT</i>        | TraT-F  | GGTGTGGTGCGATGAGCACAG   | 290 |
|                    | TraT-R  | CACGGTTCAGCCATCCCTGAG   |     |
| PATHOGENIC ISLANDS |         |                         |     |
| <i>malX</i>        | MALX-F  | GGACATCCTGTTACAGCGCGCA  | 925 |
|                    | MALX-R  | TCGCCACCAATCACAGCCGAAC  |     |

### Primers used for detection of phylogroups in *E. coli*.

The PCR method and the sequences of the primers to identify the virulence genes were described by:

Clermont, O.; Christenson, JK.; Denamur, E.; Gordon, DM. The Clermont *Escherichia coli* phylo-typing method revisited: improvement of specificity and detection of new phylo-groups. *Environ. Microbiol. Rep.* **2013**, 5, 58-65.

| PCR reaction | Target          | Sequence (5'-3')                                             | PCR product size (bp) |
|--------------|-----------------|--------------------------------------------------------------|-----------------------|
| Multiplex    | <i>chuA</i>     | (F) ATGGTACCGGACGAACCAAC<br>(R) TGCCGCCAGTACCAAAGACA         | 288                   |
|              | <i>yjaA</i>     | (F) CAAACGTGAAGTGTGAGGAG<br>(R) AATGCGTTCCTCAACCTGTG         | 211                   |
|              | <i>TspE4.C2</i> | (F) CACTATTCGTAAGGTCATCC<br>(R) AGTTTATCGCTGCGGGTCGC         | 152                   |
|              | <i>arpA</i>     | (F) AACGCTATTCGCCAGCTTGC<br>(R) TCTCCCCATACCGTACGCTA         | 400                   |
| Group E      | <i>arpA</i>     | (F) GATTCCATCTTGTCAAAATATGCC<br>(R) GAAAAGAAAAAGAATTCCCAAGAG | 301                   |
| Group C      | <i>trpA</i>     | (F) AGTTTTATGCCAGTGCGAG                                      | 219                   |

|                  |             |                                                       |     |
|------------------|-------------|-------------------------------------------------------|-----|
|                  |             | (R) TCTGCGCCGGTCACGCCC                                |     |
| Internal control | <i>trpA</i> | (F) CGGCGATAAAGACATCTTCAC<br>(R) GCAACGCGGCCTGGCGGAAG | 489 |
